# Supplementary material
Source: MDPI journal article supplement (https://www.mdpi.com/2297-8739/10/12/585)
Supplement: s1 [file s1]

## SUPPLEMENTARY MATERIAL

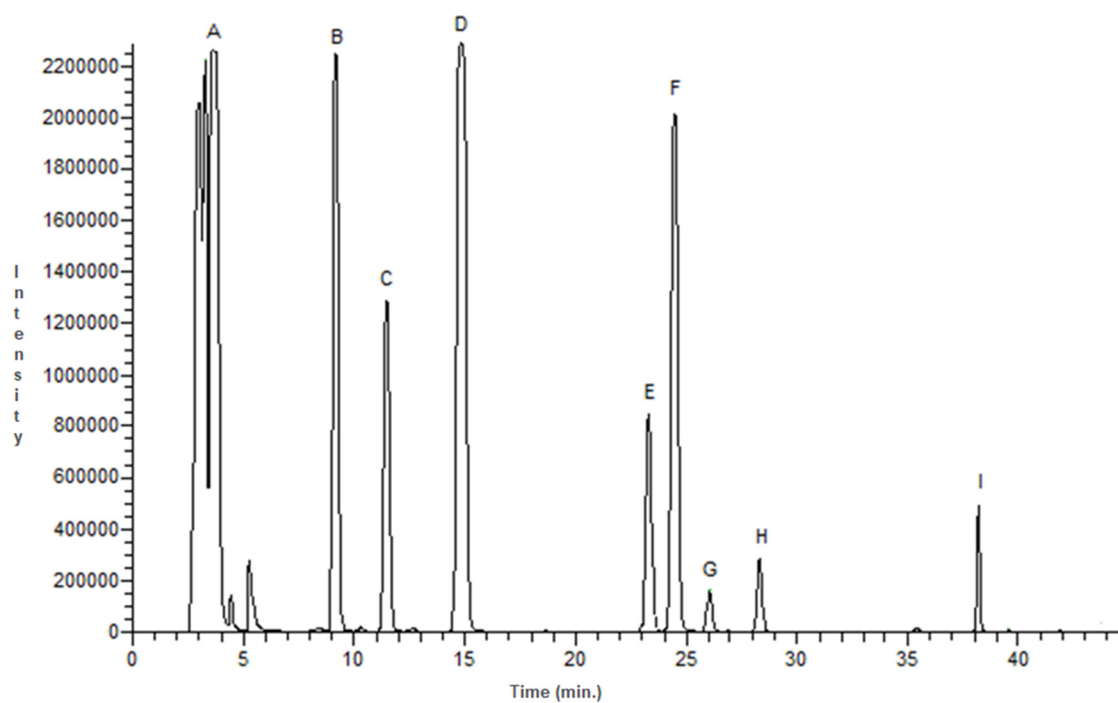

**Figure S1.** Chromatogram obtained at 254 nm in the analysis of a solution containing standards of the studied BAs (90 mg/L). A - DNS; B - Methylamine; C - Ethylamine; D - Dimethylamine; E - Phenylethylamine; F - Isopentylamine; G - Putrescine; H - Cadaverine; I - Tyramine.

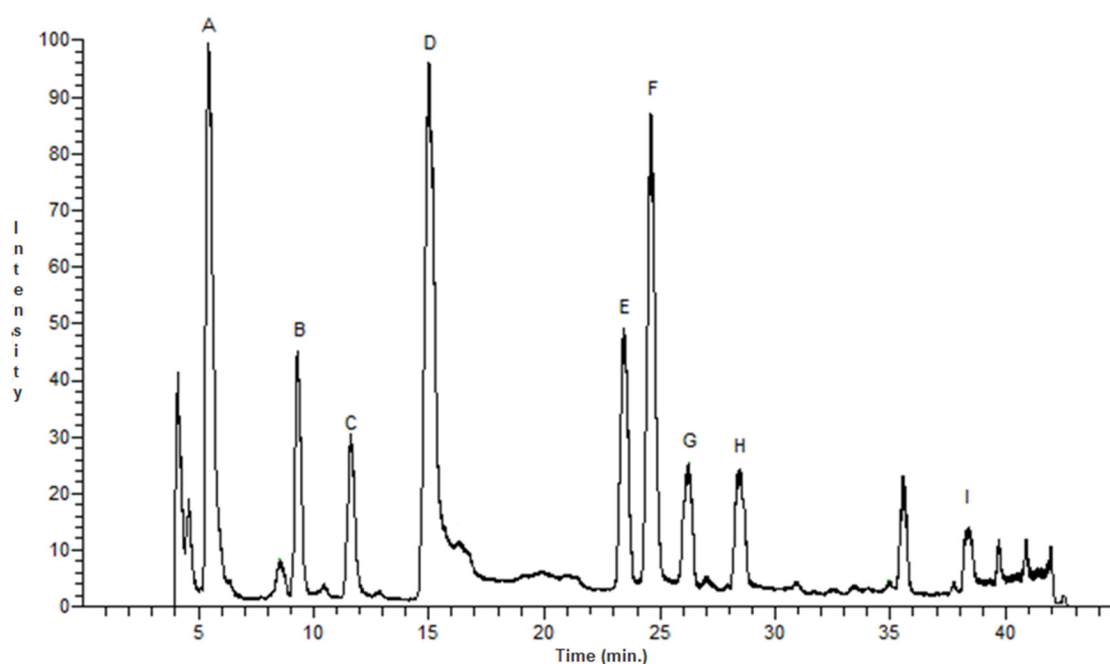

**Figure S2.** Chromatogram (TIC) obtained by HPLC-ESI/MS of the solution containing standards of BAs (90 mg/L). A - DNS; B - Methylamine; C - Ethylamine; D - Dimethylamine; E - Phenylethylamine; F - Isopentylamine; G - Putrescine; H - Cadaverine; I - Tyramine

**Table S1.** Equations of calibration curves, determination coefficients, linearity ranges, and limits of detection (LoD) and quantification (LoQ) of BAs

| Biogenic Amine   | Equation           | Linearity Range<br>(mg kg <sup>-1</sup> ) | R <sup>2</sup> | LoD (mg kg <sup>-1</sup> ) | LoQ (mg kg <sup>-1</sup> ) |
|------------------|--------------------|-------------------------------------------|----------------|----------------------------|----------------------------|
| Methylamine      | $y=2.0139x+0.0187$ | 0.1 - 1                                   | 0.998          | 0.063                      | 0.208                      |
| Phenylethylamine | $y=0.6055x+0.0058$ | 0.1 - 1                                   | 0.998          | 0.060                      | 0.198                      |
| Isopentylamine   | $y=1.5128x+0.0218$ | 0.1 - 1                                   | 0.999          | 0.026                      | 0.086                      |
| Dimethylamine    | $y=3.6799x+0.4640$ | 0.1 - 1                                   | 0.988          | 0.164                      | 0.546                      |
| Putrescine       | $y=0.1127x+0.2267$ | 1 - 200                                   | 0.999          | 0.534                      | 6.475                      |
| Cadaverine       | $y=0.1840x+1.5541$ | 0.1 - 400                                 | 0.996          | 0.822                      | 2.740                      |
| Tyramine         | $y=0.2536x+1.1478$ | 0.1 - 300                                 | 0.997          | 0.362                      | 1.206                      |
